# Supplementary material for: Worldwide burden and epidemiological trends of tracheal, bronchus, and lung cancer: A population-based study
Source: PubMed Central journal article supplement (PMC8935504; doi:10.1016/j.ebiom.2022.103951), 2022-03-18
Supplement: mmc1.pdf [file mmc1.pdf]

Incidence AAPC for Men (>= 50 years old)

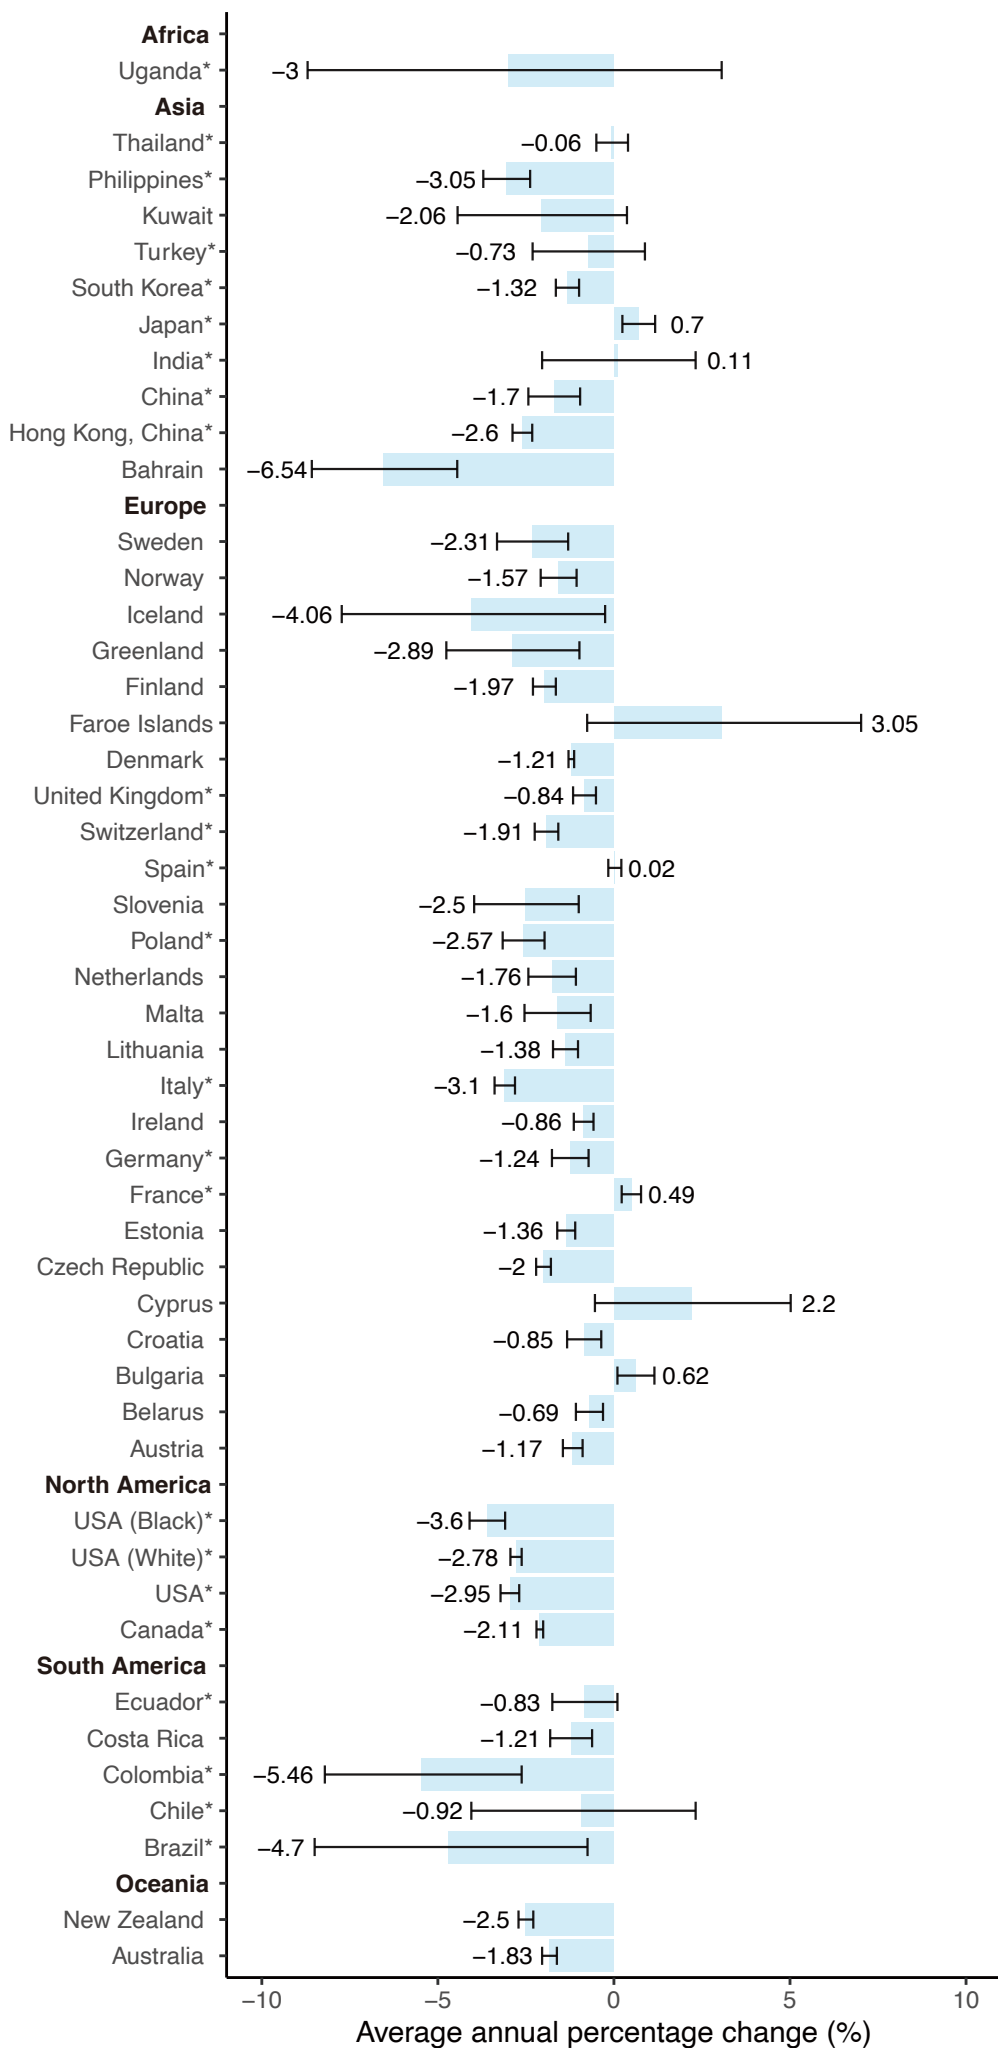

Incidence AAPC for Women (>= 50 years old)

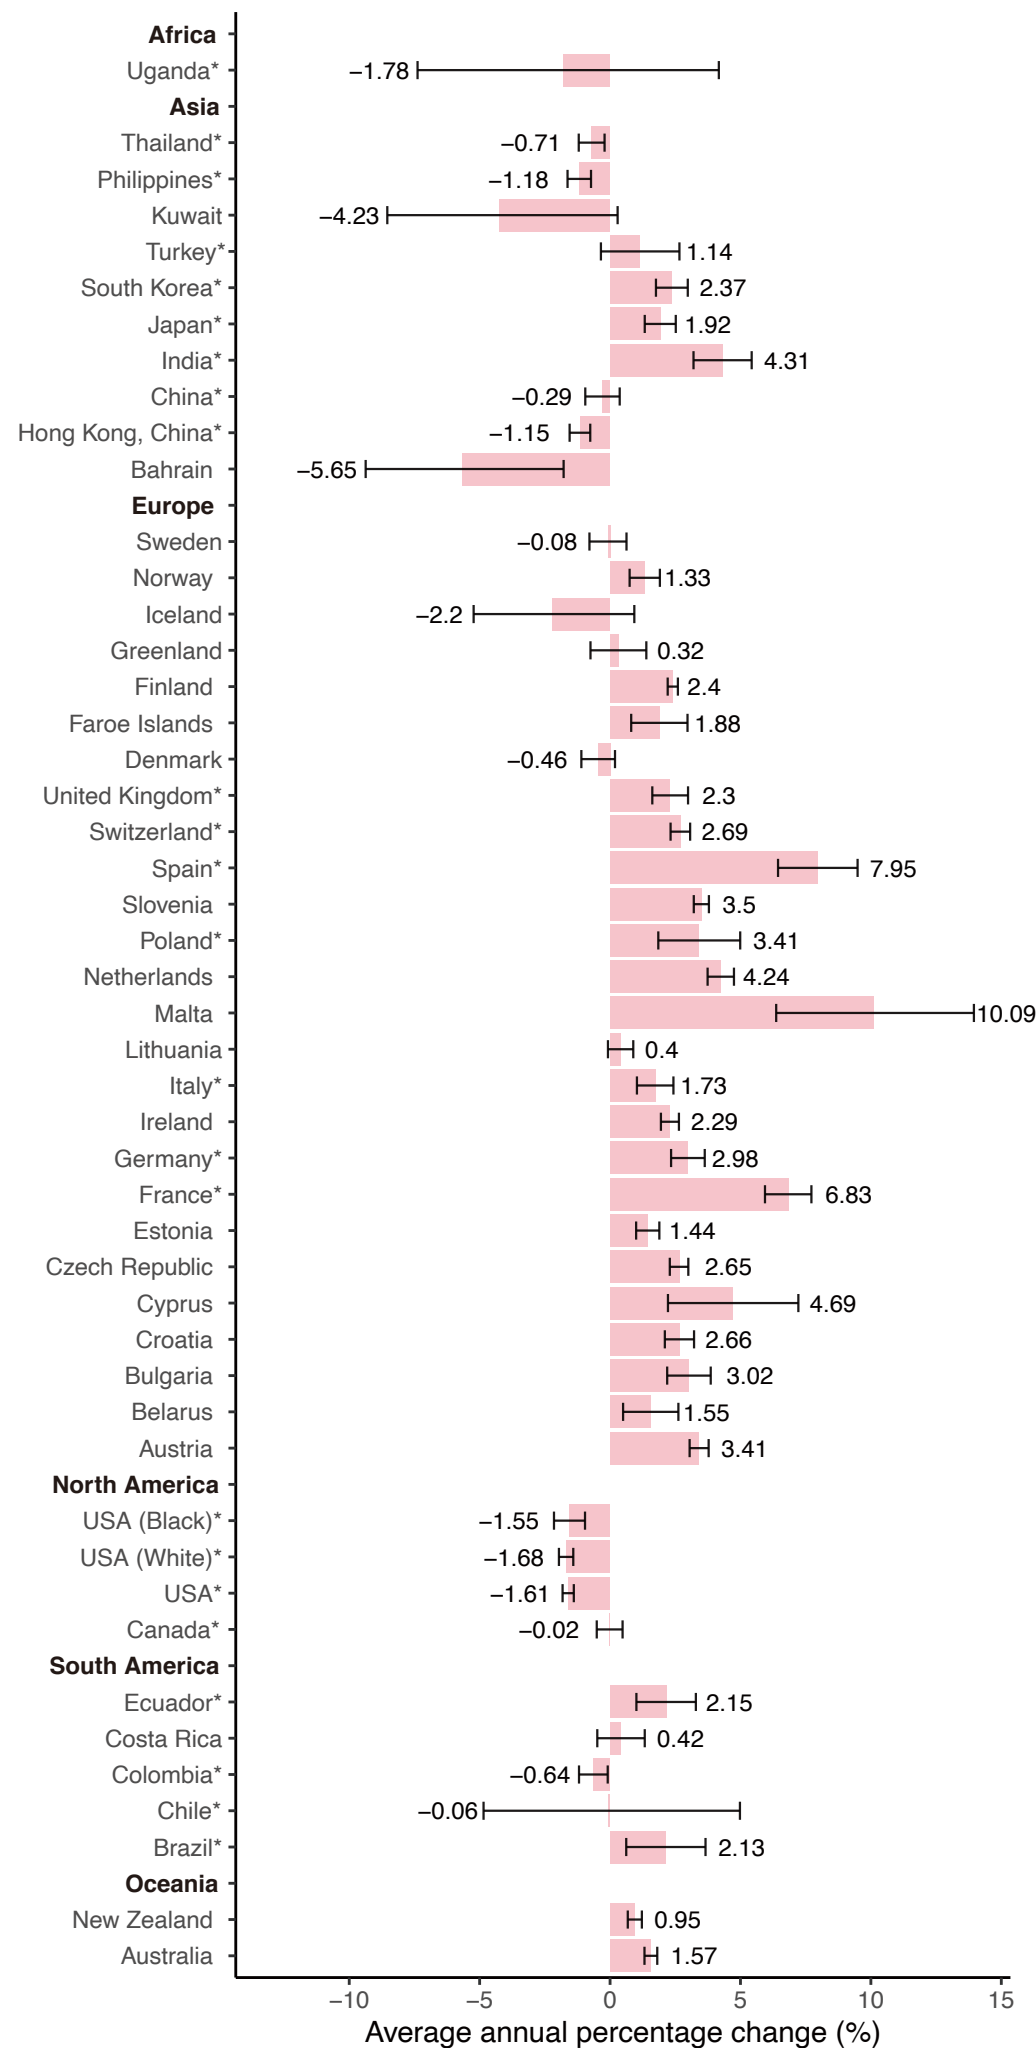

Incidence AAPC for Men (< 50 years old)

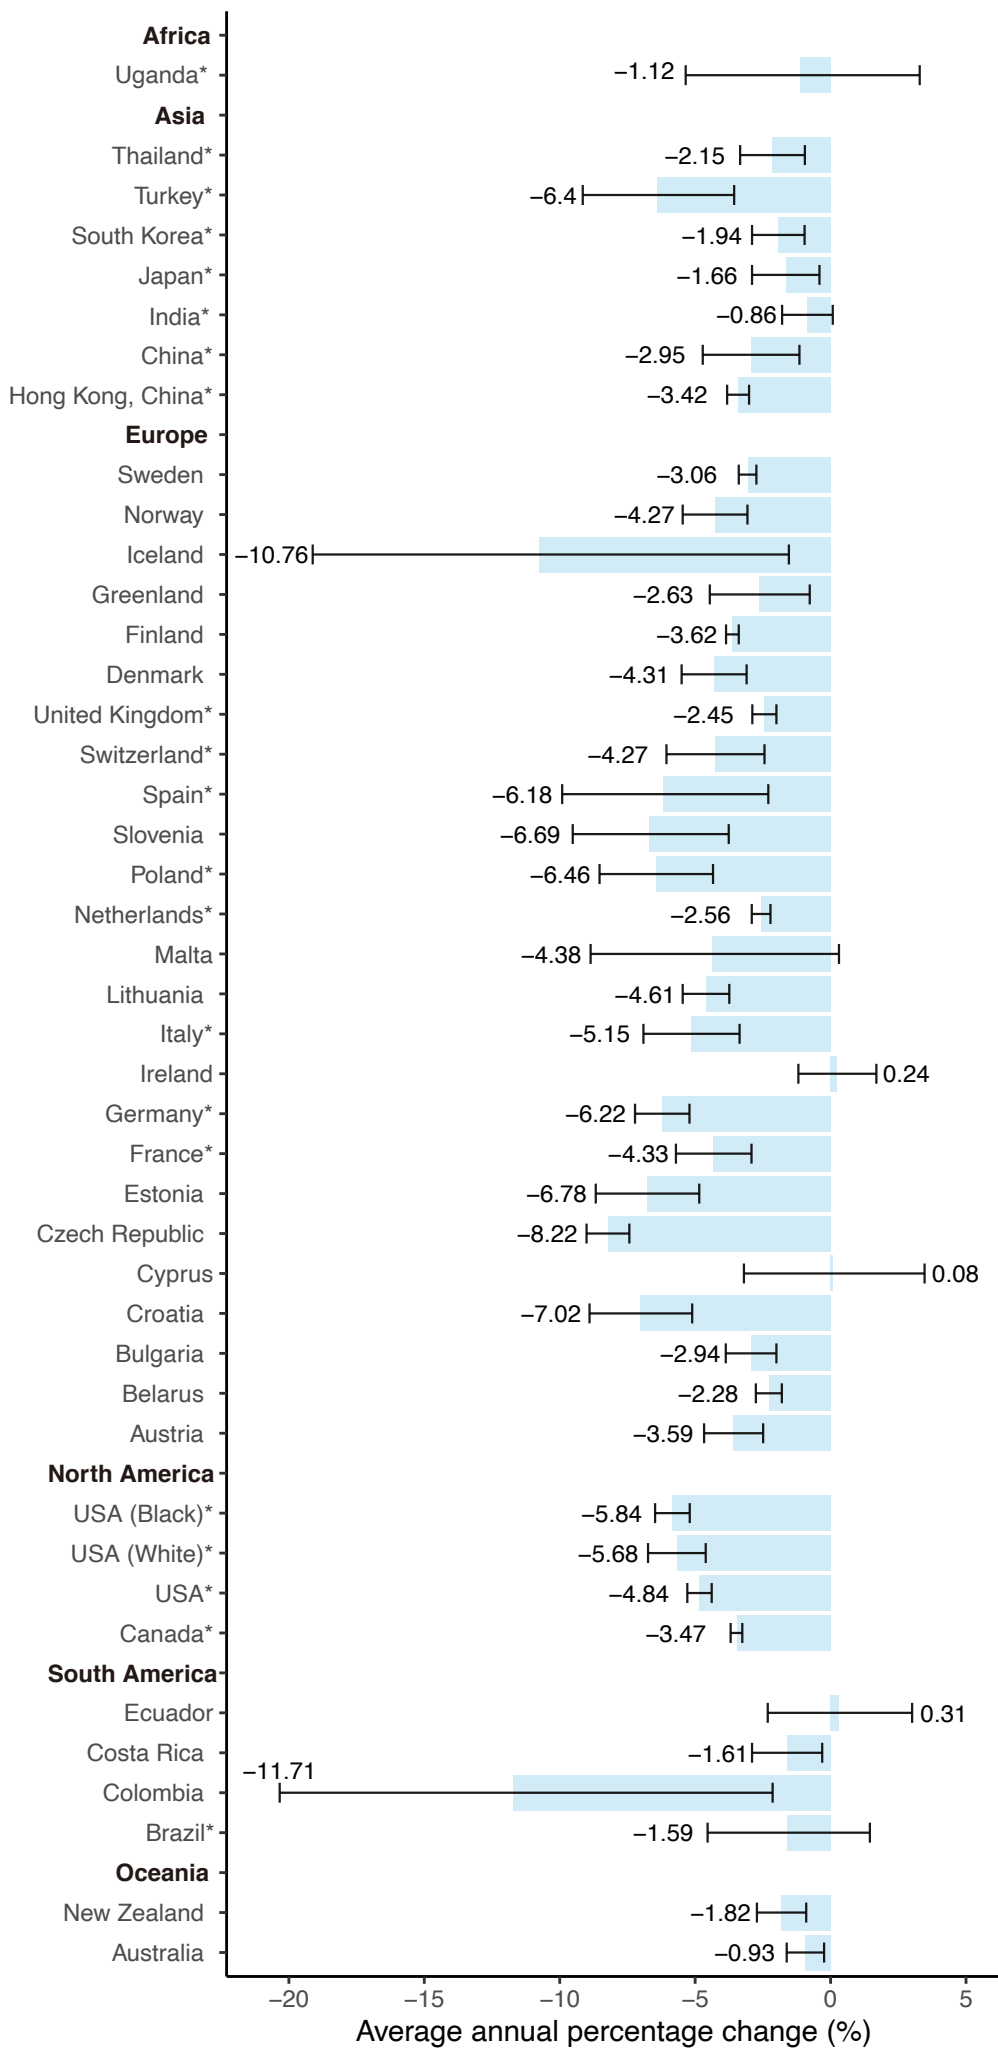

Incidence AAPC for Women (< 50 years old)

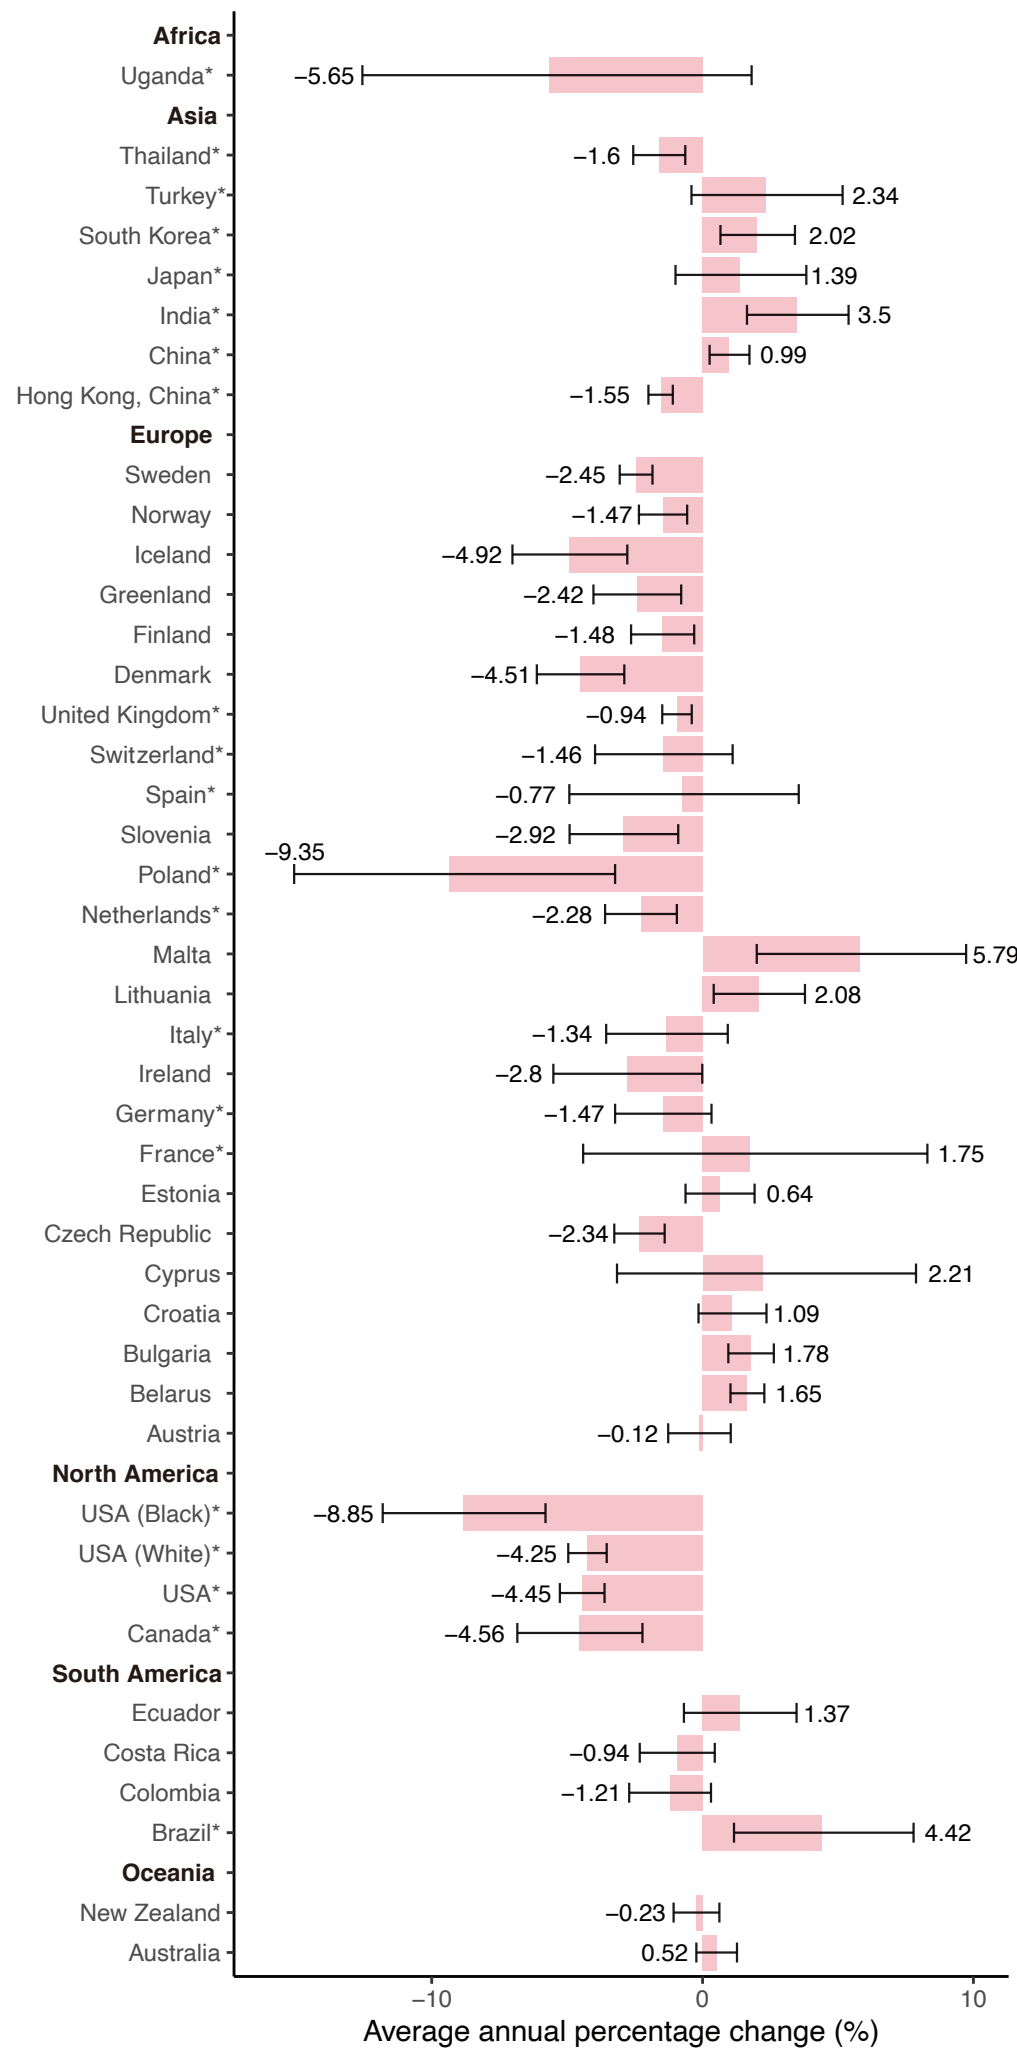

Table S1. The incidence and mortality data of tracheal, bronchus, and lung cancer

| Country          | Incidence |         | Mortality |         |
|------------------|-----------|---------|-----------|---------|
| Australia        | 1993-2012 | CI5     | 1979-2018 | WHO     |
| Austria          | 1998-2012 | CI5     | 1980-2019 | WHO     |
| Bahrain          | 1998-2012 | CI5     | 1985-2014 | WHO     |
| Belarus          | 1983-2012 | CI5     | 1981-2018 | WHO     |
| Belgium          | NA        | NA      | 1979-2016 | WHO     |
| Brazil           | 1993-2012 | CI5*    | 1979-2018 | WHO     |
| Bulgaria         | 1998-2012 | CI5     | 1980-2018 | WHO     |
| Canada           | 1983-2012 | CI5*    | 1979-2019 | WHO     |
| Chile            | 1998-2012 | CI5*    | 1980-2018 | WHO     |
| China            | 1998-2012 | CI5*    | NA        | NA      |
| Colombia         | 1983-2012 | CI5*    | 1984-2017 | WHO     |
| Costa Rica       | 1982-2011 | CI5     | 1980-2018 | WHO     |
| Croatia          | 1988-2012 | CI5     | 1985-2017 | WHO     |
| Cyprus           | 1998-2012 | CI5     | 1999-2018 | WHO     |
| Czech Republic   | 1983-2012 | CI5     | 1986-2019 | WHO     |
| Denmark          | 1943-2018 | Nordcan | 1970-2018 | Nordcan |
| Ecuador          | 1985-2012 | CI5*    | 1979-2017 | WHO     |
| Estonia          | 1983-2012 | CI5     | 1994-2019 | WHO     |
| Faroe Islands    | 1961-2018 | Nordcan | 1983-2018 | Nordcan |
| Finland          | 1953-2018 | Nordcan | 1953-2018 | Nordcan |
| France           | 1998-2011 | CI5*    | 1979-2016 | WHO     |
| Germany          | 1998-2012 | CI5*    | 1990-2019 | WHO     |
| Greenland        | 1977-2018 | Nordcan | 1983-2018 | Nordcan |
| China, Hong Kong | 1983-2012 | CI5*    | 1979-2017 | WHO     |
| Iceland          | 1955-2018 | Nordcan | 1951-2018 | Nordcan |
| India            | 1983-2012 | CI5*    | NA        | NA      |
| Ireland          | 1994-2012 | CI5     | 1979-2015 | WHO     |
| Israel           | 1963-2012 | CI5     | 1979-2018 | WHO     |
| Italy            | 1998-2010 | CI5*    | 1979-2017 | WHO     |
| Japan            | 1998-2010 | CI5*    | 1979-2017 | WHO     |
| South Korea      | 1999-2012 | CI5*    | 1985-2019 | WHO     |
| Kuwait           | 1998-2012 | CI5     | 1979-2017 | WHO     |
| Latvia           | NA        | NA      | 1984-2018 | WHO     |
| Lithuania        | 1988-2012 | CI5     | 1993-2019 | WHO     |
| Malta            | 1993-2012 | CI5     | 1979-2017 | WHO     |
| Netherlands      | 1989-2012 | CI5     | 1979-2018 | WHO     |
| New Zealand      | 1983-2012 | CI5     | 1979-2016 | WHO     |
| Norway           | 1953-2018 | Nordcan | 1961-2018 | Nordcan |
| Philippines      | 1983-2012 | CI5*    | 1992-2014 | WHO     |
| Poland           | 1998-2012 | CI5*    | 1980-2018 | WHO     |
| Portugal         | NA        | NA      | 1980-2018 | WHO     |

|                    |           |         |           |         |
|--------------------|-----------|---------|-----------|---------|
| Russian Federation | NA        | NA      | 1980-2019 | WHO     |
| Singapore          | NA        | NA      | 1979-2019 | WHO     |
| Slovenia           | 1983-2012 | CI5     | 1985-2019 | WHO     |
| Spain              | 1993-2010 | CI5*    | 1980-2017 | WHO     |
| Sweden             | 1960-2018 | Nordcan | 1952-2018 | Nordcan |
| Switzerland        | 1998-2012 | CI5*    | 1995-2017 | WHO     |
| Turkey             | 1998-2012 | CI5*    | NA        | NA      |
| Thailand           | 1993-2012 | CI5*    | 1979-2019 | WHO     |
| Uganda             | 1993-2012 | CI5*    | NA        | NA      |
| United Kingdom     | 1995-2012 | CI5*    | 1979-2016 | WHO     |
| USA                | 1975-2018 | SEER*   | 1969-2019 | SEER    |
| USA Black          | 1975-2018 | SEER*   | 1969-2020 | SEER    |
| USA White          | 1975-2018 | SEER*   | 1969-2021 | SEER    |

CI5: Cancer Incidence in Five Continents V; NORDCAN: Nordic Cancer Registries; SEER: Surveillance, Epidemiology, and End Results Program; WHO: World Health Organization; NA: not available.

\*Subnational data; Brazil, Goiania; Canada (excl. Nunavut, Quebec and Yukon); Chile, Valdivia; China (5 registries); Colombia, Cali; Ecuador, Quito; France (9 registries); Germany (2 registries); India, Chennai; Italy (8 registries); Japan (4 registries); Korea (5 registries); Republic of Korea; Philippines, Manila; Poland, Kielce; Spain (9 registries); Switzerland (6 registries); Thailand (4 registries); Turkey (2 registries); Uganda, Kampala; UK, England; USA, ( 9 registries)

Table S2. The AAPC of the mortality of tracheal, bronchus, and lung cancer in individuals of all ages.

| Country            | Lower endpoint | Upper endpoint | AAPC   | 95%CI-Low | 95%CI-High | P-value | Sex  |
|--------------------|----------------|----------------|--------|-----------|------------|---------|------|
| Asia               |                |                |        |           |            |         |      |
| Bahrain            | 2005           | 2014           | -12.18 | -14.01    | -10.3      | < 0.001 | male |
| Hong Kong, China   | 2008           | 2017           | -2.98  | -3.38     | -2.58      | < 0.001 | male |
| Israel             | 2009           | 2018           | -1.59  | -2.03     | -1.14      | < 0.001 | male |
| Japan              | 2009           | 2018           | -2.27  | -2.57     | -1.97      | < 0.001 | male |
| South Korea        | 2010           | 2019           | -3.66  | -4.17     | -3.15      | < 0.001 | male |
| Kuwait             | 2008           | 2017           | -3.13  | -3.68     | -2.58      | < 0.001 | male |
| Philippines        | 2001           | 2014           | -2.52  | -3.11     | -1.92      | < 0.001 | male |
| Singapore          | 2009           | 2019           | -5.69  | -9.76     | -1.44      | 0.009   | male |
| Thailand           | 2010           | 2019           | 0.68   | 0.35      | 1.01       | < 0.001 | male |
| Europe             |                |                |        |           |            |         |      |
| Austria            | 2010           | 2019           | -2.11  | -2.21     | -2         | < 0.001 | male |
| Belarus            | 2002           | 2018           | -2.06  | -2.26     | -1.86      | < 0.001 | male |
| Belgium            | 2007           | 2016           | -2.83  | -3.02     | -2.64      | < 0.001 | male |
| Bulgaria           | 2009           | 2018           | -1.38  | -2.02     | -0.73      | < 0.001 | male |
| Croatia            | 2008           | 2017           | -1.4   | -1.57     | -1.23      | < 0.001 | male |
| Cyprus             | 2009           | 2018           | 1.52   | -0.06     | 3.12       | 0.057   | male |
| Czech Republic     | 2010           | 2019           | -3.98  | -4.22     | -3.75      | < 0.001 | male |
| Estonia            | 2010           | 2019           | -2.35  | -2.63     | -2.08      | < 0.001 | male |
| France             | 2007           | 2016           | -1.96  | -2.2      | -1.71      | < 0.001 | male |
| Germany            | 2010           | 2019           | -2.21  | -3.06     | -1.34      | < 0.001 | male |
| Ireland            | 2006           | 2015           | -2.45  | -2.63     | -2.26      | < 0.001 | male |
| Italy              | 2008           | 2017           | -2.98  | -3.08     | -2.89      | < 0.001 | male |
| Latvia             | 2009           | 2018           | -1.73  | -1.97     | -1.49      | < 0.001 | male |
| Lithuania          | 2010           | 2019           | -1.86  | -2.03     | -1.69      | < 0.001 | male |
| Malta              | 2008           | 2017           | -1.96  | -2.31     | -1.61      | < 0.001 | male |
| Netherlands        | 2009           | 2018           | -3.62  | -4.13     | -3.11      | < 0.001 | male |
| Poland             | 2009           | 2018           | -2.85  | -3.04     | -2.66      | < 0.001 | male |
| Portugal           | 2009           | 2018           | 0.09   | -0.09     | 0.27       | 0.32    | male |
| Russian Federation | 2010           | 2019           | -1.9   | -2.11     | -1.69      | < 0.001 | male |
| Slovenia           | 2010           | 2019           | -2.57  | -2.82     | -2.32      | < 0.001 | male |
| Spain              | 2008           | 2017           | -1.8   | -1.98     | -1.63      | < 0.001 | male |
| Switzerland        | 2008           | 2017           | -3.17  | -3.7      | -2.64      | < 0.001 | male |
| United Kingdom     | 2007           | 2016           | -2.63  | -2.74     | -2.52      | < 0.001 | male |
| Denmark            | 2009           | 2018           | -3.44  | -4.67     | -2.19      | < 0.001 | male |

|                  |      |      |       |       |       |         |        |
|------------------|------|------|-------|-------|-------|---------|--------|
| Faroe Islands    | 2009 | 2018 | -2.36 | -3.31 | -1.4  | < 0.001 | male   |
| Finland          | 2009 | 2018 | -2.37 | -2.78 | -1.96 | < 0.001 | male   |
| Greenland        | 2009 | 2018 | -3.73 | -5.9  | -1.5  | 0.002   | male   |
| Iceland          | 2009 | 2018 | -1.77 | -2.39 | -1.14 | < 0.001 | male   |
| Norway           | 2009 | 2018 | -3.71 | -4.42 | -2.98 | < 0.001 | male   |
| Sweden           | 2009 | 2018 | -2.94 | -3.37 | -2.52 | < 0.001 | male   |
| North America    |      |      |       |       |       |         |        |
| Canada           | 2010 | 2019 | -4.05 | -4.44 | -3.65 | < 0.001 | male   |
| USA              | 2010 | 2019 | -4.7  | -4.95 | -4.44 | < 0.001 | male   |
| USA (White)      | 2010 | 2019 | -4.63 | -4.89 | -4.37 | < 0.001 | male   |
| USA (Black)      | 2010 | 2019 | -5.21 | -5.58 | -4.83 | < 0.001 | male   |
| South America    |      |      |       |       |       |         |        |
| Brazil           | 2010 | 2019 | -1.53 | -1.7  | -1.36 | < 0.001 | male   |
| Chile            | 2009 | 2018 | -1.39 | -1.57 | -1.21 | < 0.001 | male   |
| Colombia         | 2008 | 2017 | -2.2  | -2.58 | -1.82 | < 0.001 | male   |
| Costa Rica       | 2010 | 2019 | -2.8  | -3.13 | -2.47 | < 0.001 | male   |
| Ecuador          | 2008 | 2017 | -3.14 | -4.64 | -1.61 | < 0.001 | male   |
| Oceania          |      |      |       |       |       |         |        |
| Australia        | 2009 | 2018 | -2.92 | -3.01 | -2.84 | < 0.001 | male   |
| New Zealand      | 2007 | 2016 | -2.86 | -3    | -2.73 | < 0.001 | male   |
| Asia             |      |      |       |       |       |         |        |
| Bahrain          | 2005 | 2014 | -3.44 | -5.64 | -1.18 | 0.005   | female |
| Hong Kong, China | 2008 | 2017 | -2.25 | -4.35 | -0.1  | 0.04    | female |
| Israel           | 2009 | 2018 | -1.46 | -3.11 | 0.22  | 0.088   | female |
| Japan            | 2009 | 2018 | -1.49 | -2.02 | -0.96 | < 0.001 | female |
| South Korea      | 2010 | 2019 | -3.53 | -4.2  | -2.86 | < 0.001 | female |
| Kuwait           | 2008 | 2017 | -1.95 | -2.74 | -1.16 | < 0.001 | female |
| Philippines      | 2001 | 2014 | -0.57 | -1.32 | 0.19  | 0.139   | female |
| Singapore        | 2009 | 2019 | -2.7  | -2.98 | -2.41 | < 0.001 | female |
| Thailand         | 2010 | 2019 | 1.68  | 1.34  | 2.03  | < 0.001 | female |
| Europe           |      |      |       |       |       |         |        |
| Austria          | 2010 | 2019 | 1.91  | 1.78  | 2.03  | < 0.001 | female |
| Belarus          | 2002 | 2018 | -0.71 | -1.48 | 0.06  | 0.07    | female |
| Belgium          | 2007 | 2016 | 1.76  | 0.76  | 2.78  | 0.001   | female |
| Bulgaria         | 2009 | 2018 | 2.17  | 1.45  | 2.9   | < 0.001 | female |
| Croatia          | 2008 | 2017 | 2.54  | 2.31  | 2.77  | < 0.001 | female |
| Cyprus           | 2009 | 2018 | 1.89  | -0.68 | 4.52  | 0.139   | female |
| Czech Republic   | 2010 | 2019 | 0.32  | 0.03  | 0.61  | 0.033   | female |
| Estonia          | 2010 | 2019 | 0.57  | 0.29  | 0.86  | < 0.001 | female |

|                    |      |      |       |       |       |         |        |
|--------------------|------|------|-------|-------|-------|---------|--------|
| France             | 2007 | 2016 | 2.28  | 1.82  | 2.74  | < 0.001 | female |
| Germany            | 2010 | 2019 | 0.92  | 0.6   | 1.24  | < 0.001 | female |
| Ireland            | 2006 | 2015 | -0.18 | -0.41 | 0.06  | 0.133   | female |
| Italy              | 2008 | 2017 | 1.62  | 1.49  | 1.75  | < 0.001 | female |
| Latvia             | 2009 | 2018 | 0.97  | 0.34  | 1.6   | 0.004   | female |
| Lithuania          | 2010 | 2019 | 2.45  | 0.32  | 4.62  | 0.025   | female |
| Malta              | 2008 | 2017 | 2.3   | 1.53  | 3.08  | < 0.001 | female |
| Netherlands        | 2009 | 2018 | -0.42 | -1.21 | 0.39  | 0.308   | female |
| Poland             | 2009 | 2018 | 1.5   | 0.87  | 2.14  | < 0.001 | female |
| Portugal           | 2009 | 2018 | 2.35  | 1.86  | 2.83  | < 0.001 | female |
| Russian Federation | 2010 | 2019 | 0.14  | -0.11 | 0.4   | 0.253   | female |
| Slovenia           | 2010 | 2019 | 2.46  | 2.21  | 2.7   | < 0.001 | female |
| Spain              | 2008 | 2017 | 3.94  | 3.25  | 4.64  | < 0.001 | female |
| Switzerland        | 2008 | 2017 | 0.15  | -0.48 | 0.77  | 0.631   | female |
| United Kingdom     | 2007 | 2016 | -0.8  | -1.09 | -0.5  | < 0.001 | female |
| Denmark            | 2009 | 2018 | -2.28 | -3.24 | -1.31 | < 0.001 | female |
| Faroe Islands      | 2009 | 2018 | 2.11  | 0.31  | 3.94  | 0.023   | female |
| Finland            | 2009 | 2018 | 0.55  | -1.07 | 2.19  | 0.51    | female |
| Greenland          | 2009 | 2018 | -0.31 | -1.6  | 1     | 0.633   | female |
| Iceland            | 2009 | 2018 | -3.53 | -6.64 | -0.31 | 0.032   | female |
| Norway             | 2009 | 2018 | -1.03 | -1.78 | -0.27 | 0.009   | female |
| Sweden             | 2009 | 2018 | -1.06 | -1.47 | -0.64 | < 0.001 | female |
| North America      |      |      |       |       |       |         |        |
| Canada             | 2010 | 2019 | -2.79 | -3.47 | -2.1  | < 0.001 | female |
| USA                | 2010 | 2019 | -3.25 | -3.47 | -3.02 | < 0.001 | female |
| USA (White)        | 2010 | 2019 | -3.13 | -3.36 | -2.91 | < 0.001 | female |
| USA (Black)        | 2010 | 2019 | -3.99 | -4.58 | -3.41 | < 0.001 | female |
| South America      |      |      |       |       |       |         |        |
| Brazil             | 2010 | 2019 | 1.11  | 0.63  | 1.6   | < 0.001 | female |
| Chile              | 2009 | 2018 | 0.46  | -1.96 | 2.94  | 0.712   | female |
| Colombia           | 2008 | 2017 | -1.32 | -1.79 | -0.84 | < 0.001 | female |
| Costa Rica         | 2010 | 2019 | 0.73  | -2.29 | 3.84  | 0.641   | female |
| Ecuador            | 2008 | 2017 | 0.27  | -0.35 | 0.9   | 0.386   | female |
| Oceania            |      |      |       |       |       |         |        |
| Australia          | 2009 | 2018 | -1.39 | -2.02 | -0.75 | < 0.001 | female |
| New Zealand        | 2007 | 2016 | -0.15 | -0.42 | 0.11  | 0.239   | female |

CI: Confidence Interval; AAPC: average annual percent change.

Table S3. The AAPC of the incidence of tracheal, bronchus, and lung cancer in individuals of all ages.

| Country           | Lower endpoint | Upper endpoint | AAPC  | 95%CI-Low | 95%CI-High | P-value | Sex  |
|-------------------|----------------|----------------|-------|-----------|------------|---------|------|
| Africa            |                |                |       |           |            |         |      |
| Uganda*           | 2003           | 2012           | -1.41 | -6.23     | 3.67       | 0.56    | male |
| Asia              |                |                |       |           |            |         |      |
| Bahrain           | 2003           | 2012           | -6.53 | -8.54     | -4.49      | < 0.001 | male |
| China*            | 2003           | 2012           | -1.78 | -2.39     | -1.16      | < 0.001 | male |
| Hong Kong, China* | 2003           | 2012           | -2.58 | -2.84     | -2.32      | < 0.001 | male |
| India*            | 2003           | 2012           | -0.14 | -2.29     | 2.05       | 0.897   | male |
| Israel            | 2003           | 2012           | -0.82 | -1.77     | 0.14       | 0.093   | male |
| Japan*            | 2001           | 2010           | 0.55  | 0.15      | 0.96       | 0.008   | male |
| South Korea*      | 2003           | 2012           | -1.35 | -1.67     | -1.03      | < 0.001 | male |
| Turkey*           | 2003           | 2012           | -1.23 | -2.76     | 0.32       | 0.118   | male |
| Kuwait            | 2003           | 2012           | -2.44 | -4.68     | -0.14      | 0.039   | male |
| Philippines*      | 2003           | 2012           | -4.69 | -7.42     | -1.89      | 0.001   | male |
| Thailand*         | 2003           | 2012           | -0.25 | -0.67     | 0.18       | 0.233   | male |
| Europe            |                |                |       |           |            |         |      |
| Austria           | 2003           | 2012           | -1.37 | -1.63     | -1.11      | < 0.001 | male |
| Belarus           | 2003           | 2012           | -0.79 | -1.16     | -0.42      | < 0.001 | male |
| Bulgaria          | 2003           | 2012           | 0.21  | -0.26     | 0.67       | 0.352   | male |
| Croatia           | 2003           | 2012           | -2.71 | -3.56     | -1.85      | < 0.001 | male |
| Cyprus            | 2003           | 2012           | 2.14  | -2.29     | 6.77       | 0.349   | male |
| Czech Republic    | 2003           | 2012           | -2.35 | -2.54     | -2.15      | < 0.001 | male |
| Estonia           | 2003           | 2012           | -1.62 | -1.88     | -1.36      | < 0.001 | male |
| France*           | 2002           | 2011           | 0.12  | -0.13     | 0.37       | 0.321   | male |
| Germany*          | 2003           | 2012           | -1.59 | -2.09     | -1.08      | < 0.001 | male |
| Ireland           | 2003           | 2012           | -0.81 | -1.09     | -0.53      | < 0.001 | male |
| Italy*            | 2001           | 2010           | -3.21 | -3.53     | -2.88      | < 0.001 | male |
| Lithuania         | 2003           | 2012           | -1.61 | -1.96     | -1.26      | < 0.001 | male |
| Malta             | 2003           | 2012           | -1.79 | -2.72     | -0.85      | 0.001   | male |
| Netherlands       | 2003           | 2012           | -1.76 | -2.5      | -1.01      | < 0.001 | male |
| Poland*           | 2003           | 2012           | -2.85 | -3.4      | -2.3       | < 0.001 | male |
| Slovenia          | 2003           | 2012           | 3.31  | 3.06      | 3.57       | < 0.001 | male |
| Spain*            | 2001           | 2010           | -0.34 | -0.53     | -0.15      | 0.002   | male |
| Switzerland*      | 2003           | 2012           | -2.08 | -2.35     | -1.81      | < 0.001 | male |
| United Kingdom*   | 2003           | 2012           | -0.86 | -1.19     | -0.53      | < 0.001 | male |
| Denmark           | 2009           | 2018           | -1.27 | -1.34     | -1.19      | < 0.001 | male |



|                  |      |      |       |       |       |         |        |
|------------------|------|------|-------|-------|-------|---------|--------|
| Faroe Islands    | 2009 | 2018 | 5.06  | 0.75  | 9.56  | 0.022   | male   |
| Finland          | 2009 | 2018 | -1.82 | -2.2  | -1.45 | < 0.001 | male   |
| Greenland        | 2009 | 2018 | -2.82 | -4.84 | -0.75 | 0.009   | male   |
| Iceland          | 2009 | 2018 | -4.24 | -8.92 | 0.68  | 0.09    | male   |
| Norway           | 2009 | 2018 | -1.45 | -1.95 | -0.94 | < 0.001 | male   |
| Sweden           | 2009 | 2018 | -1.1  | -1.2  | -0.99 | < 0.001 | male   |
| North America    |      |      |       |       |       |         |        |
| Canada*          | 2003 | 2012 | -2.18 | -2.27 | -2.09 | < 0.001 | male   |
| USA*             | 2009 | 2018 | -3.06 | -3.32 | -2.79 | < 0.001 | male   |
| USA (White)*     | 2009 | 2018 | -2.87 | -3.02 | -2.71 | < 0.001 | male   |
| USA (Black)*     | 2009 | 2018 | -3.76 | -4.24 | -3.28 | < 0.001 | male   |
| South America    |      |      |       |       |       |         |        |
| Brazil*          | 2003 | 2012 | -4.61 | -8.69 | -0.35 | 0.034   | male   |
| Chile*           | 2003 | 2012 | -1.48 | -4.49 | 1.62  | 0.317   | male   |
| Colombia*        | 2003 | 2012 | -5.69 | -8.21 | -3.11 | < 0.001 | male   |
| Costa Rica       | 2002 | 2011 | -1.23 | -1.8  | -0.66 | < 0.001 | male   |
| Ecuador*         | 2003 | 2012 | -0.74 | -1.67 | 0.21  | 0.122   | male   |
| Oceania          |      |      |       |       |       |         |        |
| Australia        | 2003 | 2012 | -1.78 | -1.99 | -1.57 | < 0.001 | male   |
| New Zealand      | 2003 | 2012 | -2.5  | -2.7  | -2.29 | < 0.001 | male   |
| Africa           |      |      |       |       |       |         |        |
| Uganda*          | 2003 | 2012 | -2.14 | -7.86 | 3.92  | 0.454   | female |
| Asia             |      |      |       |       |       |         |        |
| Bahrain          | 2003 | 2012 | -5.72 | -9.61 | -1.65 | 0.01    | female |
| China*           | 2003 | 2012 | -0.16 | -0.75 | 0.43  | 0.571   | female |
| Hong Kong, China | 2003 | 2012 | -1.09 | -1.46 | -0.72 | < 0.001 | female |
| India*           | 2003 | 2012 | 4.34  | 3.32  | 5.36  | < 0.001 | female |
| Israel           | 2003 | 2012 | 2.06  | 1.68  | 2.43  | < 0.001 | female |
| Japan*           | 2001 | 2010 | 2.32  | 1.55  | 3.1   | < 0.001 | female |
| South Korea*     | 2003 | 2012 | 2.35  | 1.79  | 2.9   | < 0.001 | female |
| Turkey*          | 2003 | 2012 | 0.99  | -0.48 | 2.48  | 0.188   | female |
| Kuwait           | 2003 | 2012 | -4.43 | -8.55 | -0.13 | 0.045   | female |
| Philippines*     | 2003 | 2012 | -3.21 | -5.6  | -0.76 | 0.01    | female |
| Thailand*        | 2003 | 2012 | -0.8  | -1.27 | -0.33 | 0.002   | female |
| Europe           |      |      |       |       |       |         |        |
| Austria          | 2003 | 2012 | 2.9   | 2.52  | 3.3   | < 0.001 | female |

|                 |      |      |       |       |       |         |        |
|-----------------|------|------|-------|-------|-------|---------|--------|
| Belarus         | 2003 | 2012 | 1.62  | 0.68  | 2.58  | 0.002   | female |
| Bulgaria        | 2003 | 2012 | 2.8   | 2.1   | 3.51  | < 0.001 | female |
| Croatia         | 2003 | 2012 | 2.41  | 1.79  | 3.03  | < 0.001 | female |
| Cyprus          | 2003 | 2012 | 4.67  | 2.22  | 7.18  | 0.001   | female |
| Czech Republic  | 2003 | 2012 | 2.17  | 1.85  | 2.5   | < 0.001 | female |
| Estonia         | 2003 | 2012 | 1.36  | 0.93  | 1.79  | < 0.001 | female |
| France*         | 2002 | 2011 | 5.7   | 4.87  | 6.53  | < 0.001 | female |
| Germany*        | 2003 | 2012 | 2.37  | 1.7   | 3.04  | < 0.001 | female |
| Ireland         | 2003 | 2012 | 2.23  | 1.93  | 2.54  | < 0.001 | female |
| Italy*          | 2001 | 2010 | 1.34  | 0.62  | 2.06  | 0.002   | female |
| Lithuania       | 2003 | 2012 | 0.62  | 0.16  | 1.08  | 0.01    | female |
| Malta           | 2003 | 2012 | 9.39  | 6.43  | 12.43 | < 0.001 | female |
| Netherlands     | 2003 | 2012 | 3.41  | 2.81  | 4.01  | < 0.001 | female |
| Poland*         | 2003 | 2012 | 2.43  | 0.96  | 3.93  | 0.003   | female |
| Slovenia        | 2003 | 2012 | -1.92 | -2.35 | -1.49 | < 0.001 | female |
| Spain*          | 2001 | 2010 | 5.5   | 4.95  | 6.04  | < 0.001 | female |
| Switzerland*    | 2003 | 2012 | 2.2   | 1.7   | 2.69  | < 0.001 | female |
| United Kingdom* | 2003 | 2012 | 2.01  | 1.74  | 2.28  | < 0.001 | female |
| Denmark         | 2009 | 2018 | -0.16 | -0.63 | 0.31  | 0.499   | female |
| Faroe Islands   | 2009 | 2018 | 1.73  | 0.66  | 2.82  | 0.002   | female |
| Finland         | 2009 | 2018 | 1.98  | 1.84  | 2.12  | < 0.001 | female |
| Greenland       | 2009 | 2018 | 1.18  | 0.14  | 2.23  | 0.027   | female |
| Iceland         | 2009 | 2018 | -2.71 | -6.58 | 1.33  | 0.186   | female |
| Norway          | 2009 | 2018 | 1.22  | 0.57  | 1.87  | < 0.001 | female |
| Sweden          | 2009 | 2018 | 0.3   | -0.33 | 0.92  | 0.344   | female |
| North America   |      |      |       |       |       |         |        |
| Canada*         | 2003 | 2012 | -0.32 | -0.81 | 0.17  | 0.202   | female |
| USA*            | 2009 | 2018 | -1.79 | -2    | -1.58 | < 0.001 | female |
| USA (White)*    | 2009 | 2018 | -1.84 | -2.1  | -1.57 | < 0.001 | female |
| USA (Black)*    | 2009 | 2018 | -2.12 | -2.75 | -1.48 | < 0.001 | female |
| South America   |      |      |       |       |       |         |        |
| Brazil*         | 2003 | 2012 | 2.43  | 1.01  | 3.88  | 0.002   | female |
| Chile*          | 2003 | 2012 | 0.12  | -4.3  | 4.73  | 0.956   | female |
| Colombia*       | 2003 | 2012 | -0.62 | -1.19 | -0.05 | 0.033   | female |
| Costa Rica      | 2002 | 2011 | 0.28  | -0.57 | 1.14  | 0.503   | female |
| Ecuador*        | 2003 | 2012 | 2.13  | 1.05  | 3.22  | < 0.001 | female |

|             |      |      |      |      |      |         |        |
|-------------|------|------|------|------|------|---------|--------|
| Oceania     |      |      |      |      |      |         |        |
| Australia   | 2003 | 2012 | 1.47 | 1.23 | 1.7  | < 0.001 | female |
| New Zealand | 2003 | 2012 | 1.05 | 0.79 | 1.31 | < 0.001 | female |

---

\*Subnational data; CI: Confidence Interval; AAPC: average annual percent change.

Table S4. The AAPC of the incidence of tracheal, bronchus, and lung cancer in individuals older than 50 years old.

| Country           | Lower endpoint | Upper endpoint | AAPC  | 95%CI-Low | 95%CI-High | P-value | Sex  |
|-------------------|----------------|----------------|-------|-----------|------------|---------|------|
| Africa            |                |                |       |           |            |         |      |
| Uganda*           | 2003           | 2012           | -3    | -8.7      | 3.06       | 0.302   | male |
| Asia              |                |                |       |           |            |         |      |
| Bahrain           | 2003           | 2012           | -6.54 | -8.58     | -4.45      | < 0.001 | male |
| China*            | 2003           | 2012           | -1.7  | -2.43     | -0.96      | < 0.001 | male |
| Hong Kong, China* | 2003           | 2012           | -2.6  | -2.88     | -2.32      | < 0.001 | male |
| India*            | 2003           | 2012           | 0.11  | -2.04     | 2.32       | 0.918   | male |
| Japan*            | 2001           | 2010           | 0.7   | 0.24      | 1.17       | 0.003   | male |
| South Korea*      | 2003           | 2012           | -1.32 | -1.65     | -0.99      | < 0.001 | male |
| Turkey*           | 2003           | 2012           | -0.73 | -2.31     | 0.88       | 0.374   | male |
| Kuwait            | 2003           | 2012           | -2.06 | -4.44     | 0.37       | 0.089   | male |
| Philippines*      | 2003           | 2012           | -3.05 | -3.71     | -2.38      | < 0.001 | male |
| Thailand*         | 2003           | 2012           | -0.06 | -0.5      | 0.4        | 0.797   | male |
| Europe            |                |                |       |           |            |         |      |
| Austria           | 2003           | 2012           | -1.17 | -1.45     | -0.89      | < 0.001 | male |
| Belarus           | 2003           | 2012           | -0.69 | -1.08     | -0.31      | 0.001   | male |
| Bulgaria          | 2003           | 2012           | 0.62  | 0.1       | 1.15       | 0.022   | male |
| Croatia           | 2003           | 2012           | -0.85 | -1.33     | -0.36      | 0.002   | male |
| Cyprus            | 2003           | 2012           | 2.2   | -0.54     | 5.02       | 0.116   | male |
| Czech Republic    | 2003           | 2012           | -2    | -2.21     | -1.79      | < 0.001 | male |
| Estonia           | 2003           | 2012           | -1.36 | -1.61     | -1.1       | < 0.001 | male |
| France*           | 2002           | 2011           | 0.49  | 0.22      | 0.77       | 0.002   | male |
| Germany*          | 2003           | 2012           | -1.24 | -1.76     | -0.72      | < 0.001 | male |
| Ireland           | 2003           | 2012           | -0.86 | -1.14     | -0.58      | < 0.001 | male |
| Italy*            | 2001           | 2010           | -3.1  | -3.39     | -2.81      | < 0.001 | male |
| Lithuania         | 2003           | 2012           | -1.38 | -1.73     | -1.02      | < 0.001 | male |
| Malta             | 2003           | 2012           | -1.6  | -2.54     | -0.66      | 0.002   | male |
| Netherlands       | 2003           | 2012           | -1.76 | -2.43     | -1.08      | < 0.001 | male |
| Poland*           | 2003           | 2012           | -2.57 | -3.16     | -1.97      | < 0.001 | male |
| Slovenia          | 2003           | 2012           | -2.5  | -3.97     | -1         | 0.001   | male |
| Spain*            | 2001           | 2010           | 0.02  | -0.16     | 0.21       | 0.778   | male |
| Switzerland*      | 2003           | 2012           | -1.91 | -2.25     | -1.58      | < 0.001 | male |
| United Kingdom*   | 2003           | 2012           | -0.84 | -1.16     | -0.51      | < 0.001 | male |
| Denmark           | 2010           | 2019           | -1.21 | -1.29     | -1.13      | < 0.001 | male |

|                  |      |      |       |       |       |         |        |
|------------------|------|------|-------|-------|-------|---------|--------|
| Faroe Islands    | 2010 | 2019 | 3.05  | -0.76 | 7.02  | 0.116   | male   |
| Finland          | 2010 | 2019 | -1.97 | -2.3  | -1.65 | < 0.001 | male   |
| Greenland        | 2010 | 2019 | -2.89 | -4.76 | -0.98 | 0.004   | male   |
| Iceland          | 2010 | 2019 | -4.06 | -7.73 | -0.25 | 0.037   | male   |
| Norway           | 2010 | 2019 | -1.57 | -2.08 | -1.06 | < 0.001 | male   |
| Sweden           | 2010 | 2019 | -2.31 | -3.32 | -1.3  | < 0.001 | male   |
| North America    |      |      |       |       |       |         |        |
| Canada*          | 2003 | 2012 | -2.11 | -2.2  | -2.01 | < 0.001 | male   |
| USA*             | 2009 | 2018 | -2.95 | -3.22 | -2.69 | < 0.001 | male   |
| USA (White)*     | 2009 | 2018 | -2.78 | -2.94 | -2.62 | < 0.001 | male   |
| USA (Black)*     | 2009 | 2018 | -3.6  | -4.1  | -3.09 | < 0.001 | male   |
| South America    |      |      |       |       |       |         |        |
| Brazil*          | 2003 | 2012 | -4.7  | -8.5  | -0.75 | 0.02    | male   |
| Chile*           | 2003 | 2012 | -0.92 | -4.05 | 2.32  | 0.546   | male   |
| Colombia*        | 2003 | 2012 | -5.46 | -8.21 | -2.62 | < 0.001 | male   |
| Costa Rica       | 2002 | 2011 | -1.21 | -1.81 | -0.62 | < 0.001 | male   |
| Ecuador*         | 2003 | 2012 | -0.83 | -1.75 | 0.1   | 0.079   | male   |
| Oceania          |      |      |       |       |       |         |        |
| Australia        | 2003 | 2012 | -1.83 | -2.04 | -1.62 | < 0.001 | male   |
| New Zealand      | 2003 | 2012 | -2.5  | -2.71 | -2.29 | < 0.001 | male   |
| Africa           |      |      |       |       |       |         |        |
| Uganda*          | 2003 | 2012 | -1.78 | -7.38 | 4.17  | 0.525   | female |
| Asia             |      |      |       |       |       |         |        |
| Bahrain          | 2003 | 2012 | -5.65 | -9.37 | -1.78 | 0.008   | female |
| China*           | 2003 | 2012 | -0.29 | -0.95 | 0.37  | 0.36    | female |
| Hong Kong, China | 2003 | 2012 | -1.15 | -1.55 | -0.76 | < 0.001 | female |
| India*           | 2003 | 2012 | 4.31  | 3.2   | 5.43  | < 0.001 | female |
| Japan*           | 2001 | 2010 | 1.92  | 1.33  | 2.52  | < 0.001 | female |
| South Korea*     | 2003 | 2012 | 2.37  | 1.76  | 2.98  | < 0.001 | female |
| Turkey*          | 2003 | 2012 | 1.14  | -0.35 | 2.66  | 0.135   | female |
| Kuwait           | 2003 | 2012 | -4.23 | -8.54 | 0.29  | 0.064   | female |
| Philippines*     | 2003 | 2012 | -1.18 | -1.63 | -0.73 | < 0.001 | female |
| Thailand*        | 2003 | 2012 | -0.71 | -1.2  | -0.21 | 0.008   | female |
| Europe           |      |      |       |       |       |         |        |
| Austria          | 2003 | 2012 | 3.41  | 3.05  | 3.78  | < 0.001 | female |
| Belarus          | 2003 | 2012 | 1.55  | 0.5   | 2.62  | 0.006   | female |

|                    |      |      |       |       |       |         |        |
|--------------------|------|------|-------|-------|-------|---------|--------|
| Bulgaria           | 2003 | 2012 | 3.02  | 2.19  | 3.86  | < 0.001 | female |
| Croatia            | 2003 | 2012 | 2.66  | 2.1   | 3.22  | < 0.001 | female |
| Cyprus             | 2003 | 2012 | 4.69  | 2.22  | 7.22  | 0.001   | female |
| Czech<br>Republic  | 2003 | 2012 | 2.65  | 2.29  | 3     | < 0.001 | female |
| Estonia            | 2003 | 2012 | 1.44  | 1     | 1.89  | < 0.001 | female |
| France*            | 2002 | 2011 | 6.83  | 5.94  | 7.72  | < 0.001 | female |
| Germany*           | 2003 | 2012 | 2.98  | 2.34  | 3.63  | < 0.001 | female |
| Ireland            | 2003 | 2012 | 2.29  | 1.95  | 2.64  | < 0.001 | female |
| Italy*             | 2001 | 2010 | 1.73  | 1.03  | 2.43  | < 0.001 | female |
| Lithuania          | 2003 | 2012 | 0.4   | -0.08 | 0.89  | 0.099   | female |
| Malta              | 2003 | 2012 | 10.09 | 6.37  | 13.95 | < 0.001 | female |
| Netherlands        | 2003 | 2012 | 4.24  | 3.74  | 4.75  | < 0.001 | female |
| Poland*            | 2003 | 2012 | 3.41  | 1.85  | 4.99  | < 0.001 | female |
| Slovenia           | 2003 | 2012 | 3.5   | 3.21  | 3.79  | < 0.001 | female |
| Spain*             | 2001 | 2010 | 7.95  | 6.44  | 9.49  | < 0.001 | female |
| Switzerland*       | 2003 | 2012 | 2.69  | 2.32  | 3.07  | < 0.001 | female |
| United<br>Kingdom* | 2003 | 2012 | 2.3   | 1.62  | 2.99  | < 0.001 | female |
| Denmark            | 2010 | 2019 | -0.46 | -1.1  | 0.19  | 0.164   | female |
| Faroe<br>Islands   | 2010 | 2019 | 1.88  | 0.81  | 2.97  | 0.001   | female |
| Finland            | 2010 | 2019 | 2.4   | 2.21  | 2.6   | < 0.001 | female |
| Greenland          | 2010 | 2019 | 0.32  | -0.75 | 1.39  | 0.554   | female |
| Iceland            | 2010 | 2019 | -2.2  | -5.23 | 0.93  | 0.166   | female |
| Norway             | 2010 | 2019 | 1.33  | 0.75  | 1.91  | < 0.001 | female |
| Sweden             | 2010 | 2019 | -0.08 | -0.79 | 0.63  | 0.814   | female |
| North<br>America   |      |      |       |       |       |         |        |
| Canada*            | 2003 | 2012 | -0.02 | -0.51 | 0.48  | 0.947   | female |
| USA*               | 2009 | 2018 | -1.61 | -1.82 | -1.39 | < 0.001 | female |
| USA<br>(White)*    | 2009 | 2018 | -1.68 | -1.96 | -1.41 | < 0.001 | female |
| USA<br>(Black)*    | 2009 | 2018 | -1.55 | -2.15 | -0.96 | < 0.001 | female |
| South<br>America   |      |      |       |       |       |         |        |
| Brazil*            | 2003 | 2012 | 2.13  | 0.62  | 3.66  | 0.008   | female |
| Chile*             | 2003 | 2012 | -0.06 | -4.85 | 4.98  | 0.98    | female |
| Colombia*          | 2003 | 2012 | -0.64 | -1.19 | -0.09 | 0.024   | female |
| Costa Rica         | 2002 | 2011 | 0.42  | -0.49 | 1.33  | 0.352   | female |
| Ecuador*           | 2003 | 2012 | 2.15  | 1.01  | 3.29  | 0.001   | female |
| Oceania            |      |      |       |       |       |         |        |

|             |      |      |      |      |      |         |        |
|-------------|------|------|------|------|------|---------|--------|
| Australia   | 2003 | 2012 | 1.57 | 1.32 | 1.81 | < 0.001 | female |
| New Zealand | 2003 | 2012 | 0.95 | 0.68 | 1.22 | < 0.001 | female |

---

\*Subnational data; CI: Confidence Interval; AAPC: average annual percent change.

Table S5. The AAPC of the incidence of tracheal, bronchus, and lung cancer in individuals younger than 50 years old.

| Country           | Lower endpoint | Upper endpoint | AAPC   | 95%CI-Low | 95%CI-High | P-value | Sex  |
|-------------------|----------------|----------------|--------|-----------|------------|---------|------|
| Africa            |                |                |        |           |            |         |      |
| Uganda*           | 2003           | 2012           | -1.12  | -5.35     | 3.29       | 0.592   | male |
| Asia              |                |                |        |           |            |         |      |
| China*            | 2003           | 2012           | -2.95  | -4.72     | -1.15      | 0.001   | male |
| Hong Kong, China* | 2003           | 2012           | -3.42  | -3.82     | -3.01      | < 0.001 | male |
| India*            | 2003           | 2012           | -0.86  | -1.79     | 0.08       | 0.071   | male |
| Japan*            | 2001           | 2010           | -1.66  | -2.9      | -0.41      | 0.014   | male |
| South Korea*      | 2003           | 2012           | -1.94  | -2.9      | -0.96      | 0.001   | male |
| Turkey*           | 2003           | 2012           | -6.4   | -9.15     | -3.56      | < 0.001 | male |
| Thailand*         | 2003           | 2012           | -2.15  | -3.34     | -0.95      | 0.002   | male |
| Europe            |                |                |        |           |            |         |      |
| Austria           | 2003           | 2012           | -3.59  | -4.67     | -2.49      | < 0.001 | male |
| Belarus           | 2003           | 2012           | -2.28  | -2.76     | -1.8       | < 0.001 | male |
| Bulgaria          | 2003           | 2012           | -2.94  | -3.87     | -2         | < 0.001 | male |
| Croatia           | 2003           | 2012           | -7.02  | -8.9      | -5.11      | < 0.001 | male |
| Cyprus            | 2002           | 2012           | 0.08   | -3.2      | 3.47       | 0.959   | male |
| Czech Republic    | 2003           | 2012           | -8.22  | -9.01     | -7.43      | < 0.001 | male |
| Estonia           | 2003           | 2012           | -6.78  | -8.67     | -4.85      | < 0.001 | male |
| France*           | 2002           | 2011           | -4.33  | -5.71     | -2.92      | < 0.001 | male |
| Germany*          | 2003           | 2012           | -6.22  | -7.22     | -5.21      | < 0.001 | male |
| Ireland           | 2003           | 2012           | 0.24   | -1.19     | 1.69       | 0.731   | male |
| Italy*            | 2001           | 2010           | -5.15  | -6.91     | -3.36      | < 0.001 | male |
| Lithuania         | 2003           | 2012           | -4.61  | -5.46     | -3.74      | < 0.001 | male |
| Malta             | 2003           | 2012           | -4.38  | -8.86     | 0.31       | 0.065   | male |
| Netherlands       | 2003           | 2012           | -2.56  | -2.91     | -2.22      | < 0.001 | male |
| Poland*           | 2003           | 2012           | -6.46  | -8.53     | -4.34      | < 0.001 | male |
| Slovenia          | 2003           | 2012           | -6.69  | -9.52     | -3.76      | < 0.001 | male |
| Spain*            | 2001           | 2010           | -6.18  | -9.91     | -2.3       | 0.002   | male |
| Switzerland*      | 2003           | 2012           | -4.27  | -6.06     | -2.44      | < 0.001 | male |
| United Kingdom*   | 2003           | 2012           | -2.45  | -2.89     | -2         | < 0.001 | male |
| Denmark           | 2010           | 2019           | -4.31  | -5.5      | -3.1       | < 0.001 | male |
| Finland           | 2010           | 2019           | -3.62  | -3.86     | -3.39      | < 0.001 | male |
| Greenland         | 2007           | 2019           | -2.63  | -4.46     | -0.77      | 0.007   | male |
| Iceland           | 2009           | 2019           | -10.76 | -19.12    | -1.54      | 0.024   | male |
| Norway            | 2010           | 2019           | -4.27  | -5.46     | -3.07      | < 0.001 | male |



|                  |      |      |        |        |       |         |        |
|------------------|------|------|--------|--------|-------|---------|--------|
| Sweden           | 2010 | 2019 | -3.06  | -3.39  | -2.74 | < 0.001 | male   |
| North America    |      |      |        |        |       |         |        |
| Canada*          | 2003 | 2012 | -3.47  | -3.69  | -3.26 | < 0.001 | male   |
| USA*             | 2009 | 2018 | -4.84  | -5.29  | -4.39 | < 0.001 | male   |
| USA (White)*     | 2009 | 2018 | -5.68  | -6.74  | -4.61 | < 0.001 | male   |
| USA (Black)*     | 2009 | 2018 | -5.84  | -6.48  | -5.2  | < 0.001 | male   |
| South America    |      |      |        |        |       |         |        |
| Brazil*          | 2003 | 2012 | -1.59  | -4.54  | 1.45  | 0.284   | male   |
| Colombia         | 2003 | 2012 | -11.71 | -20.34 | -2.14 | 0.018   | male   |
| Costa Rica       | 2002 | 2011 | -1.61  | -2.9   | -0.31 | 0.017   | male   |
| Ecuador          | 2003 | 2012 | 0.31   | -2.32  | 3.01  | 0.812   | male   |
| Oceania          |      |      |        |        |       |         |        |
| Australia        | 2003 | 2012 | -0.93  | -1.62  | -0.24 | 0.011   | male   |
| New Zealand      | 2003 | 2012 | -1.82  | -2.72  | -0.9  | < 0.001 | male   |
| Africa           |      |      |        |        |       |         |        |
| Uganda*          | 2003 | 2012 | -5.65  | -12.56 | 1.81  | 0.125   | female |
| Asia             |      |      |        |        |       |         |        |
| China*           | 2003 | 2012 | 0.99   | 0.26   | 1.73  | 0.011   | female |
| Hong Kong, China | 2003 | 2012 | -1.55  | -2     | -1.1  | < 0.001 | female |
| India*           | 2003 | 2012 | 3.5    | 1.64   | 5.39  | 0.001   | female |
| Japan*           | 2001 | 2010 | 1.39   | -1     | 3.83  | 0.23    | female |
| South Korea*     | 2003 | 2012 | 2.02   | 0.66   | 3.41  | 0.007   | female |
| Turkey*          | 2003 | 2012 | 2.34   | -0.41  | 5.17  | 0.089   | female |
| Thailand*        | 2003 | 2012 | -1.6   | -2.56  | -0.64 | 0.003   | female |
| Europe           |      |      |        |        |       |         |        |
| Austria          | 2003 | 2012 | -0.12  | -1.27  | 1.04  | 0.821   | female |
| Belarus          | 2003 | 2012 | 1.65   | 1.03   | 2.28  | < 0.001 | female |
| Bulgaria         | 2003 | 2012 | 1.78   | 0.95   | 2.63  | < 0.001 | female |
| Croatia          | 2003 | 2012 | 1.09   | -0.15  | 2.36  | 0.083   | female |
| Cyprus           | 2002 | 2012 | 2.21   | -3.16  | 7.88  | 0.395   | female |
| Czech Republic   | 2003 | 2012 | -2.34  | -3.26  | -1.4  | < 0.001 | female |
| Estonia          | 2003 | 2012 | 0.64   | -0.63  | 1.92  | 0.314   | female |
| France*          | 2002 | 2011 | 1.75   | -4.41  | 8.3   | 0.587   | female |
| Germany*         | 2003 | 2012 | -1.47  | -3.23  | 0.33  | 0.1     | female |
| Ireland          | 2003 | 2012 | -2.8   | -5.51  | -0.01 | 0.049   | female |
| Italy*           | 2001 | 2010 | -1.34  | -3.56  | 0.93  | 0.218   | female |

|                 |      |      |       |        |       |         |        |
|-----------------|------|------|-------|--------|-------|---------|--------|
| Lithuania       | 2003 | 2012 | 2.08  | 0.41   | 3.78  | 0.017   | female |
| Malta           | 2003 | 2012 | 5.79  | 2      | 9.73  | 0.005   | female |
| Netherlands     | 2003 | 2012 | -2.28 | -3.6   | -0.95 | 0.001   | female |
| Poland*         | 2003 | 2012 | -9.35 | -15.08 | -3.23 | 0.003   | female |
| Slovenia        | 2003 | 2012 | -2.92 | -4.91  | -0.9  | 0.007   | female |
| Spain*          | 2001 | 2010 | -0.77 | -4.92  | 3.55  | 0.721   | female |
| Switzerland*    | 2003 | 2012 | -1.46 | -3.97  | 1.11  | 0.238   | female |
| United Kingdom* | 2003 | 2012 | -0.94 | -1.49  | -0.4  | 0.002   | female |
| Denmark         | 2010 | 2019 | -4.51 | -6.12  | -2.89 | < 0.001 | female |
| Finland         | 2010 | 2019 | -1.48 | -2.64  | -0.31 | 0.014   | female |
| Greenland       | 2006 | 2018 | -2.42 | -4.03  | -0.79 | 0.005   | female |
| Iceland         | 2009 | 2019 | -4.92 | -7.02  | -2.78 | < 0.001 | female |
| Norway          | 2010 | 2019 | -1.47 | -2.35  | -0.57 | 0.002   | female |
| Sweden          | 2010 | 2019 | -2.45 | -3.06  | -1.85 | < 0.001 | female |
| North America   |      |      |       |        |       |         |        |
| Canada*         | 2003 | 2012 | -4.56 | -6.84  | -2.22 | < 0.001 | female |
| USA*            | 2009 | 2018 | -4.45 | -5.27  | -3.62 | < 0.001 | female |
| USA (White)*    | 2009 | 2018 | -4.25 | -4.96  | -3.54 | < 0.001 | female |
| USA (Black)*    | 2009 | 2018 | -8.85 | -11.81 | -5.8  | < 0.001 | female |
| South America   |      |      |       |        |       |         |        |
| Brazil*         | 2003 | 2012 | 4.42  | 1.16   | 7.79  | 0.01    | female |
| Colombia        | 2003 | 2012 | -1.21 | -2.71  | 0.31  | 0.112   | female |
| Costa Rica      | 2002 | 2011 | -0.94 | -2.32  | 0.45  | 0.175   | female |
| Ecuador         | 2003 | 2012 | 1.37  | -0.69  | 3.47  | 0.185   | female |
| Oceania         |      |      |       |        |       |         |        |
| Australia       | 2003 | 2012 | 0.52  | -0.23  | 1.27  | 0.162   | female |
| New Zealand     | 2003 | 2012 | -0.23 | -1.07  | 0.62  | 0.585   | female |

---

\*Subnational data; CI: Confidence Interval; AAPC: average annual percent change.
